# Supplementary material
Source: ML conference proceedings conference paper supplement (https://openreview.net/forum?id=8fQlGQkj0S)
Supplement: supplementary_material [file attachment]

# ADDITIONAL EXPERIMENTS FOR REBUTTAL

**Anonymous authors**

Paper under double-blind review

## 1 U-SHAPED LOSS IN GPT-4

The experiment is designed as follows:

| Setting                | Description                                                                                                                                                                                                                                                           |
|------------------------|-----------------------------------------------------------------------------------------------------------------------------------------------------------------------------------------------------------------------------------------------------------------------|
| LLM                    | GPT-4                                                                                                                                                                                                                                                                 |
| System Message         | You are a mathematician. Consider the following math problem and follow the exact instruction.                                                                                                                                                                        |
| Prompt                 | You are given examples. Each example has two integers as input and one integer as output. Please provide an answer for the last problems in the math exercise:<br>$a_1(?)b_1=c_1$<br>...<br>$a_k(?)b_k=c_2$<br>$a_{k+1}(?)b_{k+1}=?$<br>Provide your answer directly. |
| $a_i, b_i,$ and $c_i$  | $a_i$ and $b_i$ are uniformly sampled from $[10, 99]$ , and $c_i = a_i + b_i + 1$ .                                                                                                                                                                                   |
| Goal of Task Retrieval | Aiming to retrieve the "addition" task, $a(?)b=(a+b)$ . However, the in-context samples are provided with a slightly different task "add-1 addition", $a(?)b=(a+b+1)$ .                                                                                               |
| Goal of Task Learning  | Aiming to learn the "add-1 addition" task, $a(?)b=(a+b+1)$ , with in-context samples following the same "add-1 addition" task, $a(?)b=(a+b+1)$ .                                                                                                                      |

Under the same prompt setting in the table, as the number of in-context samples increases, we observe the error rate for task learning constantly decreases while the error rate for task retrieval follows a U-shaped curve, shown in the following table.

| Number of In-context Samples ( $k$ ) | 0      | 1     | 2            | 4     | 8     | 16           |
|--------------------------------------|--------|-------|--------------|-------|-------|--------------|
| Error Rate of Task Retrieval         | 75.0%  | 36.2% | <b>33.9%</b> | 49.3% | 79.3% | 85.1%        |
| Error Rate of Task Learning          | 100.0% | 98.3% | 95.9%        | 60.5% | 24.4% | <b>16.8%</b> |

We further randomly sample four pairs of prompt and prediction for  $k = 0, 2, 8$  in the following tables for reference:

Table 1: 0 in-context samples,  $k = 0$ . Prediction is colored **red** if it is correct for task retrieval ( $a(?)b = (a + b)$ ), and colored **blue** if it is correct for task learning ( $a(?)b = (a + b + 1)$ ).

|         |                                                                                                                                                                                                         |                                                                                                                               |                                                                                                                                                                                                                   |                        |
|---------|---------------------------------------------------------------------------------------------------------------------------------------------------------------------------------------------------------|-------------------------------------------------------------------------------------------------------------------------------|-------------------------------------------------------------------------------------------------------------------------------------------------------------------------------------------------------------------|------------------------|
| prompt  | ...<br>51(?)36=<br>...                                                                                                                                                                                  | ...<br>27(?)15=<br>...                                                                                                        | ...<br>76(?)82=<br>...                                                                                                                                                                                            | ...<br>55(?)15=<br>... |
| results | Without knowing the operation or rule that connects the two input integers to the output integer in the examples, it's impossible to provide a correct answer. Please provide the examples or the rule. | Sorry, but your question is not clear. Could you please provide more information about the operation between the two numbers? | Your question seems to be missing some information. Could you please provide the examples you mentioned? They are necessary to understand the relationship between the two input integers and the output integer. | <b>70</b>              |

Table 2: 2 in-context samples,  $k = 2$ . Prediction is colored **red** if it is correct for task retrieval ( $a(?)b = (a + b)$ ), and colored **blue** if it is correct for task learning ( $a(?)b = (a + b + 1)$ ).

|         |                                                     |                                                      |                                                    |                                                      |
|---------|-----------------------------------------------------|------------------------------------------------------|----------------------------------------------------|------------------------------------------------------|
| prompt  | ...<br>73(?)80=154<br>59(?)22=82<br>54(?)97=<br>... | ...<br>48(?)73=122<br>78(?)80=159<br>21(?)33=<br>... | ...<br>21(?)28=50<br>69(?)29=99<br>47(?)10=<br>... | ...<br>94(?)43=138<br>98(?)70=169<br>96(?)41=<br>... |
| results | <b>151</b>                                          | <b>54</b>                                            | <b>57</b>                                          | 187                                                  |

Table 3: 8 in-context samples,  $k = 8$ . Prediction is colored **red** if it is correct for task retrieval ( $a(?)b = (a + b)$ ), and colored **blue** if it is correct for task learning ( $a(?)b = (a + b + 1)$ ).

|         |                                                                                                                                           |                                                                                                                                            |                                                                                                                                             |                                                                                                                                              |
|---------|-------------------------------------------------------------------------------------------------------------------------------------------|--------------------------------------------------------------------------------------------------------------------------------------------|---------------------------------------------------------------------------------------------------------------------------------------------|----------------------------------------------------------------------------------------------------------------------------------------------|
| prompt  | ...<br>37(?)70=108<br>41(?)18=60<br>19(?)12=32<br>82(?)67=150<br>42(?)13=56<br>26(?)41=68<br>80(?)39=120<br>58(?)23=82<br>40(?)90=<br>... | ...<br>60(?)76=137<br>69(?)26=96<br>72(?)85=158<br>39(?)10=50<br>50(?)47=98<br>19(?)63=83<br>45(?)95=141<br>69(?)41=111<br>81(?)36=<br>... | ...<br>66(?)40=107<br>46(?)81=128<br>63(?)31=95<br>41(?)24=66<br>70(?)43=114<br>89(?)84=174<br>76(?)82=159<br>46(?)28=75<br>49(?)46=<br>... | ...<br>68(?)88=157<br>34(?)18=53<br>70(?)70=141<br>13(?)35=49<br>52(?)50=103<br>72(?)32=105<br>98(?)82=181<br>55(?)51=107<br>50(?)31=<br>... |
| results | <b>130</b>                                                                                                                                | <b>118</b>                                                                                                                                 | <b>96</b>                                                                                                                                   | <b>82</b>                                                                                                                                    |

## 2 FLIPPED U-SHAPED LOSS UNDER PROPOSED ICL SETTING

Xie et al. (2022) observed that as the number of in-context samples increases, the performance of ICL first decreases and then increases as shown in the figure and caption below clipped and copied from the original paper.

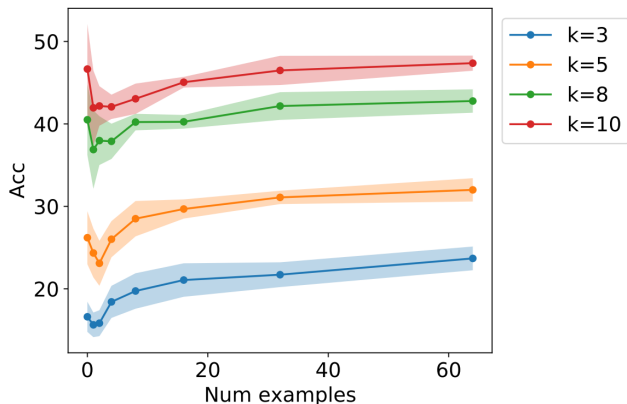

Figure 1: Zero-shot performance can be higher than one/few-shot performance in some settings in GINC, mirroring the behavior of GPT3 on some datasets such as LAMBADA (Brown et al., 2020). The few-shot setting introduces the distracting prompt structure, which can initially lower accuracy.

We show under our framework, we are able to mimic the performance tendency in the following figure which has a flipped U-shaped curve:

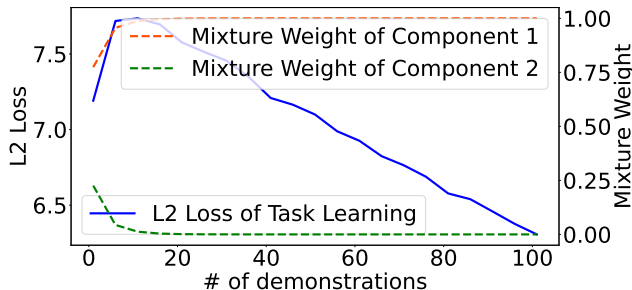

Figure 2: ICL aims to learn the prediction following in-context samples. However, due to the  $x$  distribution of in-context samples aligning with center 1, as the increasing number of in-context samples, center 1 is retrieved first which causes higher loss. Further, with a large number of in-context samples, component shifting takes effect, making the prediction align with in-context samples.

We further summarize the setting of the prior distribution and in-context task in the following table which leads to the phenomenon in Figure 2:

|                 | Mixture Weight | $\mu$          | $w$          | $\sigma_\mu$ | $\sigma_w$ | $\sigma_x$ | $\sigma_y$ |
|-----------------|----------------|----------------|--------------|--------------|------------|------------|------------|
| Component 1     | 1/2            | $\mu_1 = [+1]$ | $w_1 = [-1]$ | 0.05         | 0.05       | 1          | 2          |
| Component 2     | 1/2            | $\mu_2 = [-1]$ | $w_2 = [+1]$ | 0.05         | 0.05       | 1          | 2          |
| In-context Task | /              | $\mu^* = [+1]$ | $w^* = [+1]$ | /            | /          | 1          | 0          |

Table 4: The pretraining task prior has two components, component 1 and component 2. We are aiming to use the in-context samples to learn the prediction of the in-context task, or equivalently in this case, to retrieve the prediction of the center of component 2, (notice  $w_2$  of component 2 is equal to  $w^*$  of the in-context task). In-context task has  $\|\mu^* - \mu_1\| < \|\mu^* - \mu_2\|$  and  $\|w^* - w_1\| > \|w^* - w_2\|$ , *i.e.*, in-context samples has similar  $x$  distribution to the center of component 1 while has similar  $x \rightarrow y$  mapping to the center of component 2.

## REFERENCES

- Tom B. Brown, Benjamin Mann, Nick Ryder, Melanie Subbiah, Jared Kaplan, Prafulla Dhariwal, Arvind Neelakantan, Pranav Shyam, Girish Sastry, Amanda Askell, Sandhini Agarwal, Ariel Herbert-Voss, Gretchen Krueger, Tom Henighan, Rewon Child, Aditya Ramesh, Daniel M. Ziegler, Jeffrey Wu, Clemens Winter, Christopher Hesse, Mark Chen, Eric Sigler, Mateusz Litwin, Scott Gray, Benjamin Chess, Jack Clark, Christopher Berner, Sam McCandlish, Alec Radford, Ilya Sutskever, and Dario Amodei. Language models are few-shot learners. In *Advances in Neural Information Processing Systems 33: Annual Conference on Neural Information Processing Systems 2020, NeurIPS 2020, December 6-12, 2020, virtual*, 2020.
- Sang Michael Xie, Aditi Raghunathan, Percy Liang, and Tengyu Ma. An explanation of in-context learning as implicit Bayesian inference. In *International Conference on Learning Representations (ICLR)*. OpenReview.net, 2022.
